# Supplementary material
Source: PubMed Central journal article supplement (PMC4546856)
Supplement: NIHMS705350-supplement-1.pdf [file NIHMS705350-supplement-1.pdf]

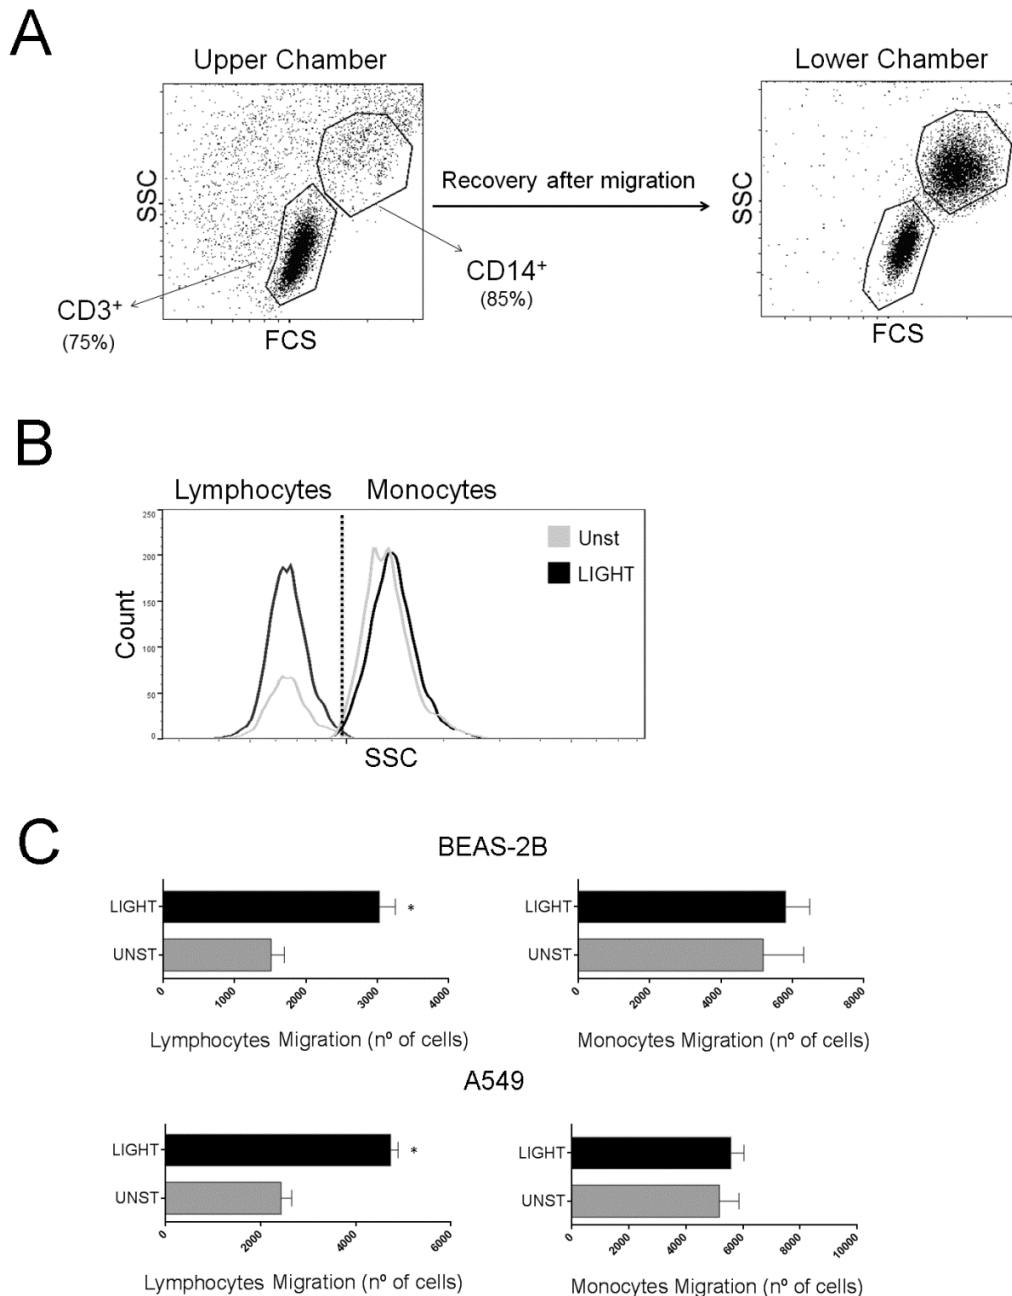

**Supplementary Figure 1. LIGHT selectively contributes to lymphocyte migration.** A mixed population of lymphocytes and monocytes were incubated in a double chamber chemotaxis assay for 120 minutes with unstimulated or LIGHT stimulated airway epithelial cell supernatant. (A) Dot plot representative of lymphocyte and monocyte populations in upper and lower chamber respectively. (B) Representative histogram of cell populations after migration towards supernatant of unstimulated (Unst) versus LIGHT stimulated BEAS-2B cells. (C) Cell numbers of migrated cells towards supernatant of unstimulated (Unst) versus LIGHT stimulated ECs. n=3 independent experiments.

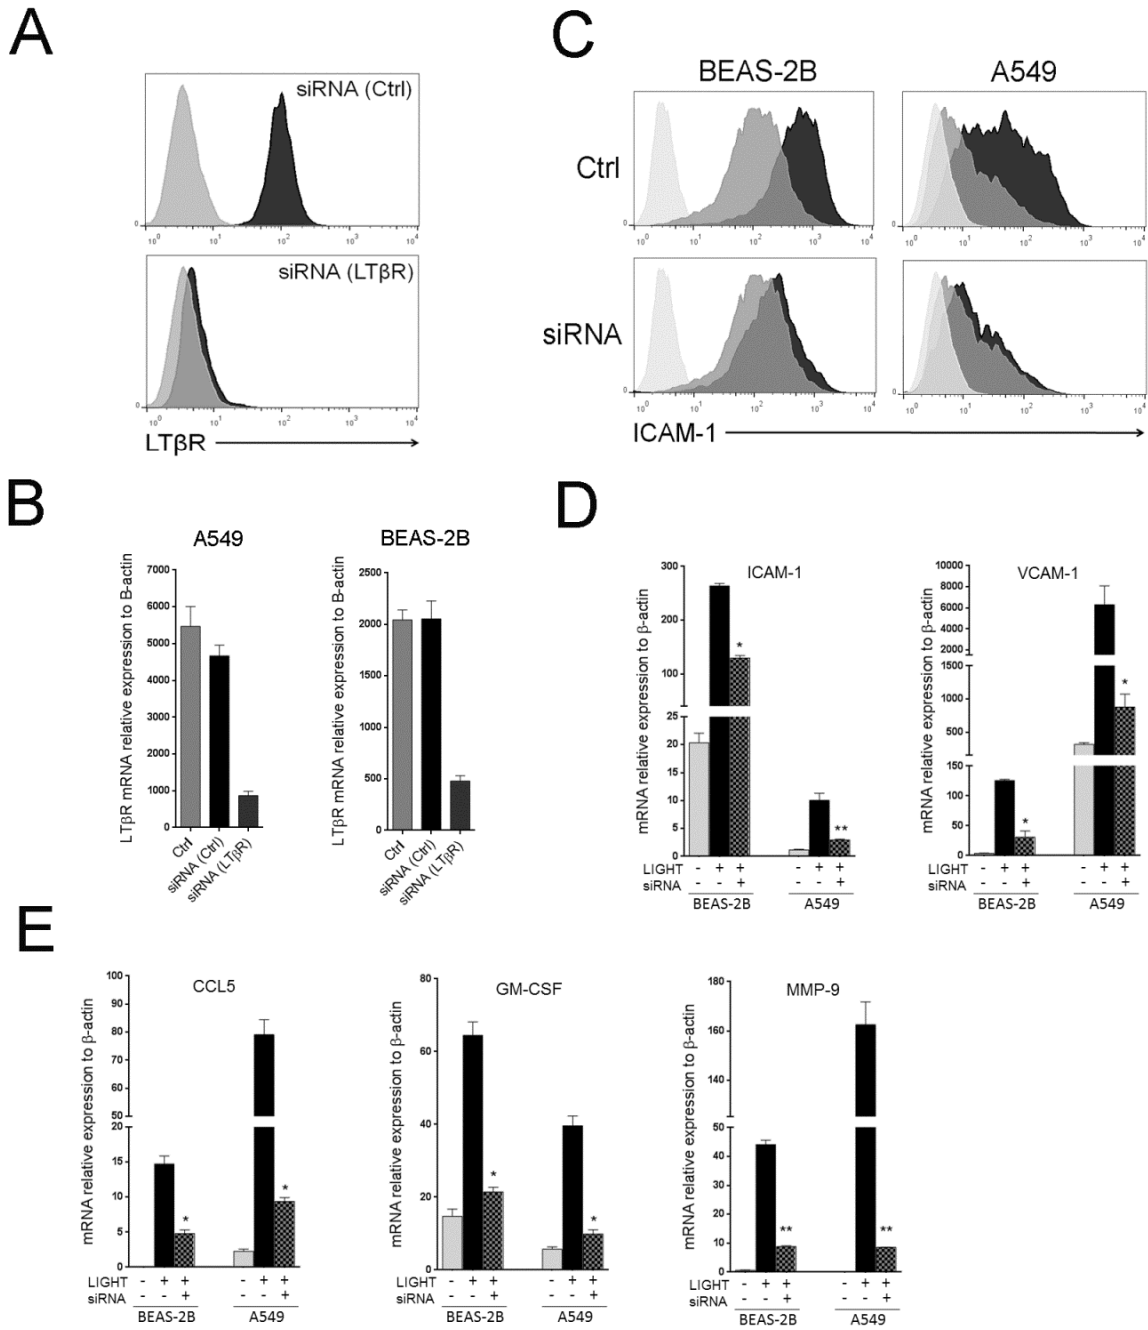

**Supplementary Figure 2. LTβR knockdown impairs activities of LIGHT.** ECs were transfected with 25nM of LTβR siRNA or Control siRNA for 24h and then left unstimulated or stimulated with LIGHT for additional 48h. (A) Representative LTβR expression assessed by flow at 72h of culture in A549 cells transfected with Ctrl siRNA or LTβR siRNA. (B) Mean mRNA of LTβR expression in A549 and BEAS-2B cells after siRNA knockdown. (C) Representative ICAM-1 expression in BEAS-2B and A549 cells by flow cytometry at 48hr. Unstimulated (gray); LIGHT (black). (D-E) Mean ICAM-1, VCAM-1, CCL5, GM-CSF and MMP-9 mRNA expression after 48hr in the different conditions. n=3.

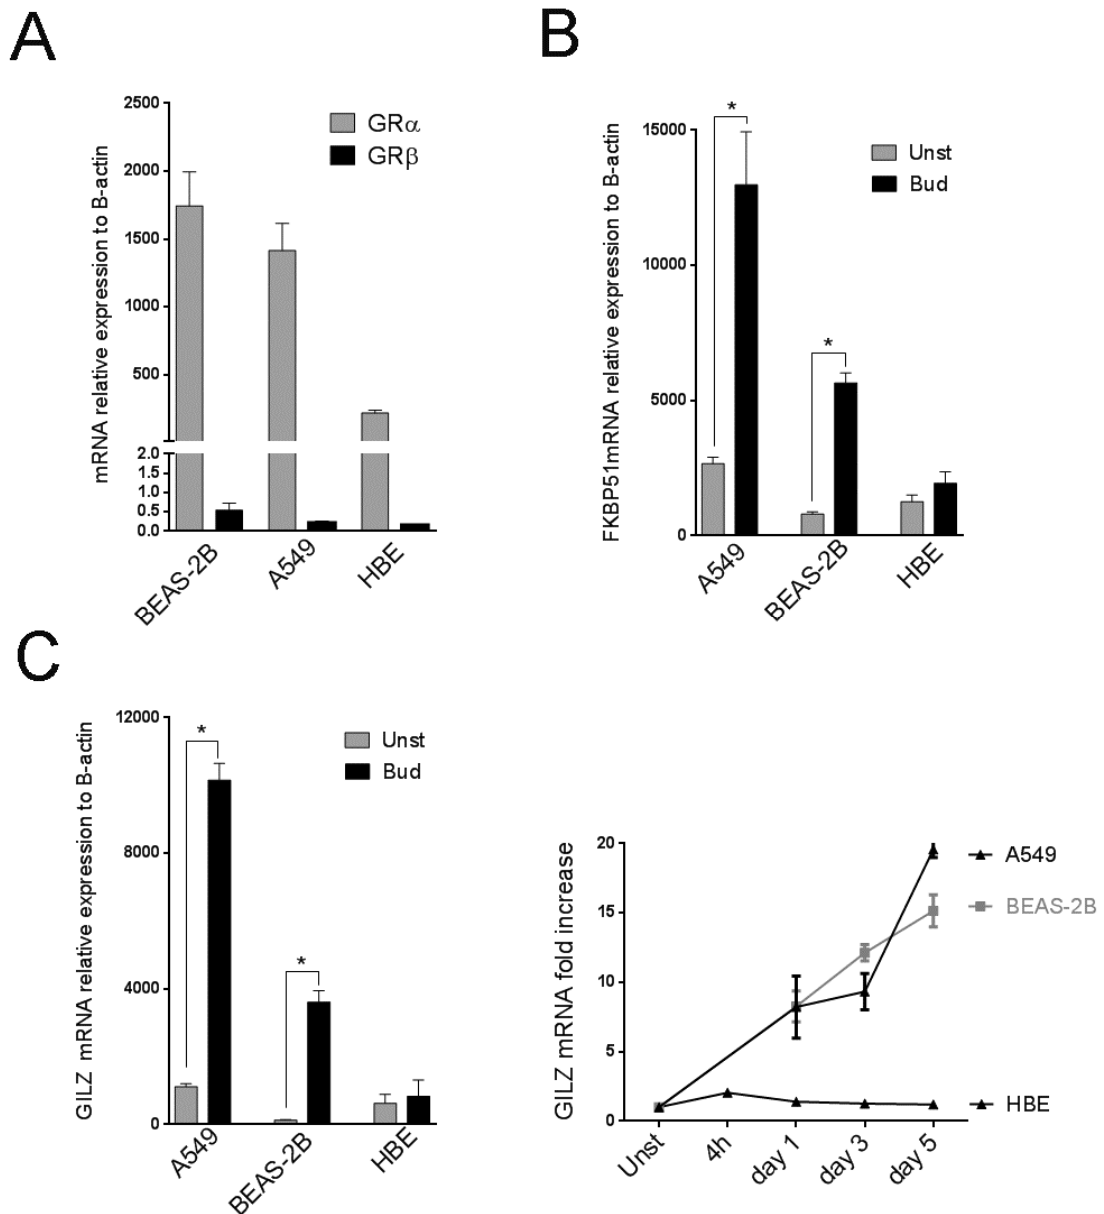

**Supplementary Figure 3. Modulation of glucocorticoid-induced genes FKBP51 and GILZ by budesonide.** ECs were left unstimulated or stimulated with LIGHT in the absence or presence of budesonide. (A) Mean mRNA expression of GR $\alpha$  and GR $\beta$  in all cell populations. (B) Mean mRNA expression of FKBP51 in ECs in the absence (grey bars) or presence of budesonide (black bars) after 24h of culture. (C) Mean GILZ mRNA expression after 24h of culture (left) or fold increase over time after budesonide stimulation in ECs (right). n=3 independent experiments.

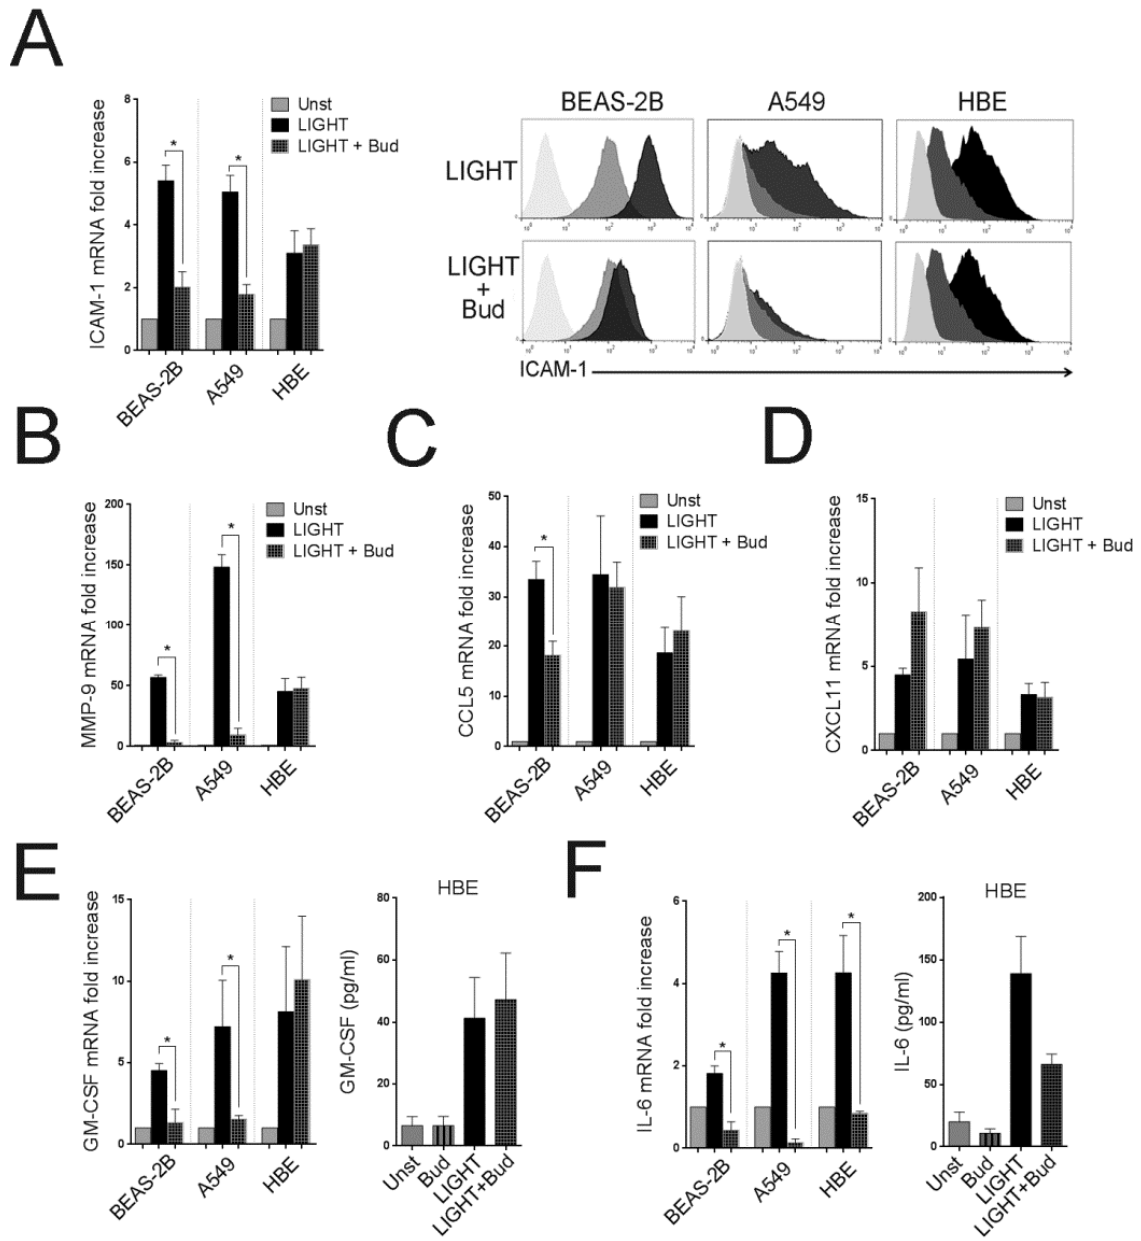

**Supplementary Figure 4. Steroid resistance and sensitivity of the action of LIGHT.**

ECs were left unstimulated or stimulated with LIGHT in the absence or presence of budesonide. (A) Mean ICAM-1 mRNA fold increase over unstimulated cells after 3 days (left) and representative ICAM-1 expression in BEAS-2B, A549, and HBE cells assessed by flow cytometry at 72hr (right). Unstimulated (gray); LIGHT or LIGHT + Bud (black). Isotype control, light gray. n=3. (B-D) Mean MMP-9, CCL5 and CXCL11 mRNA fold increase after 3 days. n=3. (E) Mean GM-CSF mRNA fold increase (left) and protein levels (right) in all ECs or HBE cells, respectively, after 3 days. n=3. (E) Mean IL-6 mRNA fold increase (left) and protein levels (right) in all ECs or HBE cells, respectively, after 3 days. n=3.
